# Supplementary material
Source: MDPI journal article supplement (https://www.mdpi.com/2072-4292/11/19/2199)
Supplement: s1 [file s1]

**GNSS radio occultation pushes forward the monitoring of volcanic clouds:  
The case of the 2008 Kasatochi eruption**

Valeria Cigala<sup>1</sup>, Riccardo Biondi<sup>1</sup>, Fred Prata<sup>2</sup>, Andrea K. Steiner<sup>3,4</sup>, Gottfried Kirchengast<sup>3,4</sup>, and  
Hugues Brenot<sup>5</sup>

<sup>1</sup>Università degli Studi di Padova, Padua, IT

<sup>2</sup>AIRES Pty Ltd, Mt Eliza, Victoria, AU

<sup>3</sup>Wegener Center for Climate and Global Change (WEGC), University of Graz, Graz, AT

<sup>4</sup>Institute for Geophysics, Astrophysics, and Meteorology/Institute of Physics, University of Graz, Graz, AT

<sup>5</sup>Royal Belgium Institute for Space Aeronomy, Brussels, BE

**Contents of this file:**

Figures S1 to S4

Tables S1 to S3

**Introduction**

The file uploaded as Supplementary Material consists of 1) one figure where the bending angle anomaly calculated from the 10° latitude band climatology and the 2.5°x2.5° grid climatology; 2) three Cloud-Aerosol Lidar with Orthogonal Polarization (CALIOP) backscatter images of the outlier data points, collocation number 5, 22, and 23, the related bending angle anomaly profiles are superimposed on the images. In these cases, the automated peak detection algorithm does not estimate the right volcanic cloud altitudes. A non-perfect spatial and temporal collocation between the volcanic cloud and the radio occultation (RO) profile is the main reason for the wrong estimation. To that, it adds the case where the volcanic aerosol is not widely extended spatially. 3) the altitude estimation table summarizing the volcanic cloud altitudes estimated from the Global Navigation Satellite System (GNSS) RO bending angle anomaly and CALIOP backscatter; 4) a table summarizing the date and time of each collocation; and 5) a table summarizing the error estimations as presented in Figure 3 in the main text.

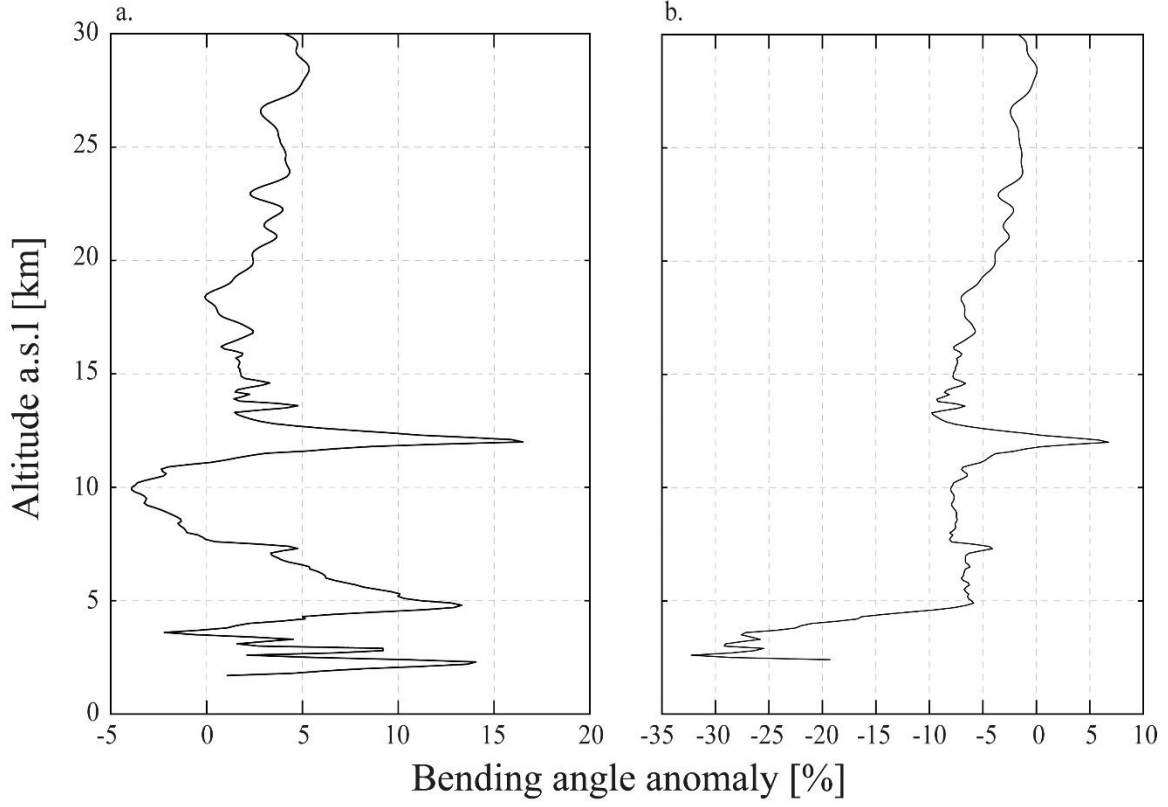

**Figure S1.** Plot a. shows the bending angle anomaly calculated as described in the main text using a  $10^\circ$  latitude band climatology and shows the same example (collocation number three) as in Figure 1 in the main text. Plot b. shows the bending angle anomaly for the same collocation but calculated using a  $2.5^\circ \times 2.5^\circ$  grid climatology. The peak corresponding to the volcanic cloud is present in both cases, in plot a. the peak is more prominent than in plot b. The same was seen for all the collocated profiles; thus, we have decided to use the  $10^\circ$  latitude bands.

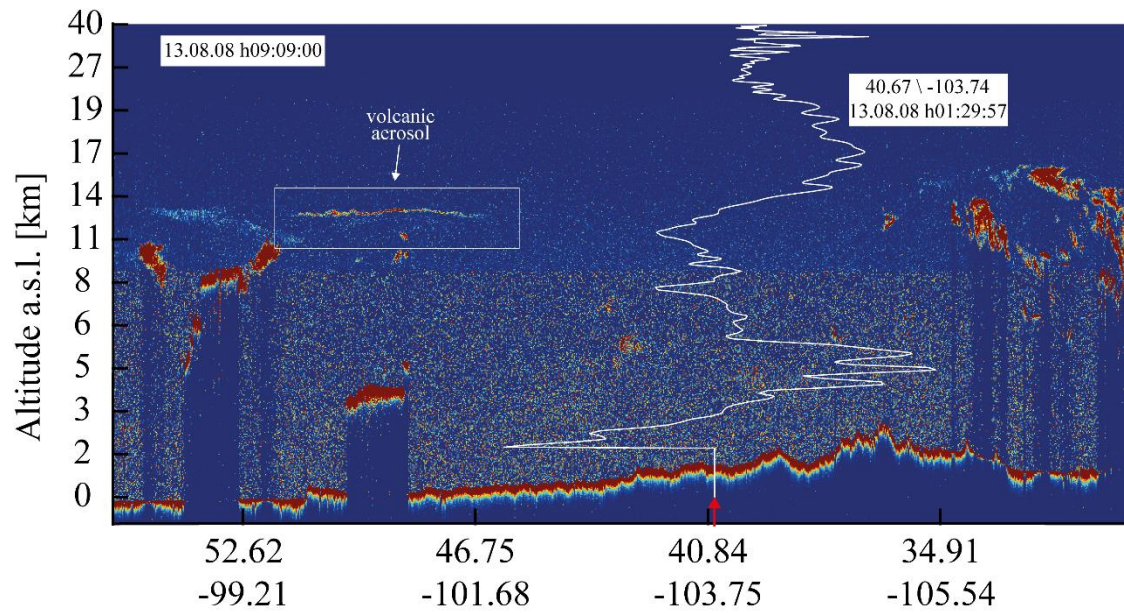

**Figure S2.** Cloud-Aerosol Lidar with Orthogonal Polarization (CALIOP) backscatter image (product of level 1) acquired on 13.08.08 with superimposed the collocated bending angle anomaly representing collocation number 5. The radio occultation (RO) profile is not well collocated with the volcanic cloud, and it is also noisy. The automated peak detection detects a peak at about 16 km, while here the volcanic cloud is at about 12 km. The red arrow represents the zero in the bending angle anomaly.

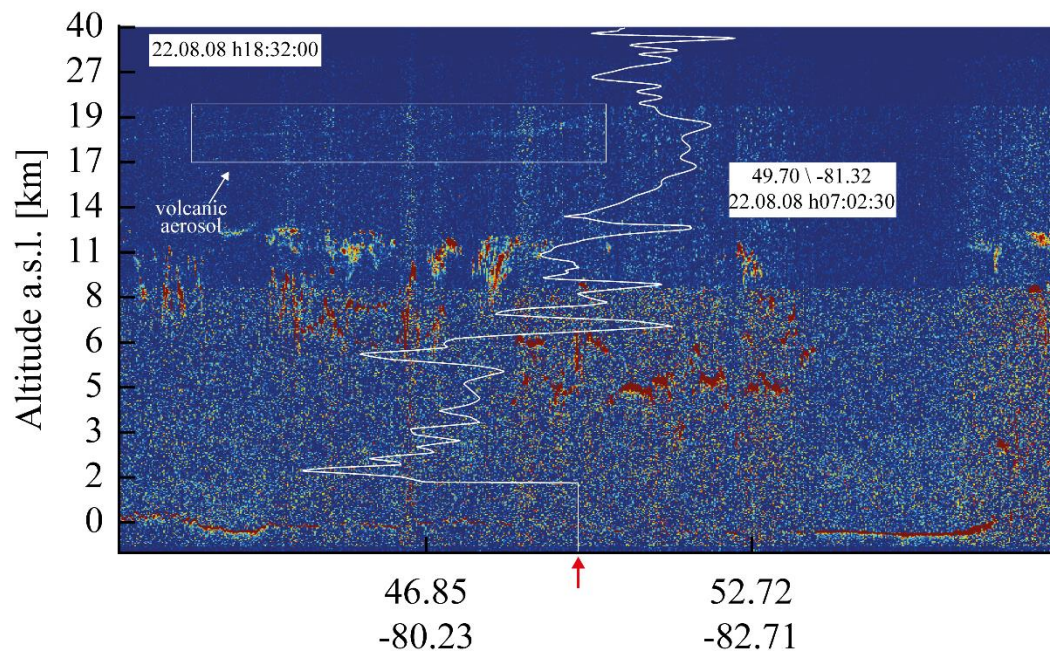

**Figure S3.** CALIOP backscatter image (product of level 1) acquired on 22.08.08 with superimposed the collocated bending angle anomaly representing collocation number 22. The RO profile is spatially well collocated with the volcanic cloud. However, the automated peak detection detects a peak at about 12 km, while the volcanic cloud is at about 18 km. The red arrow represents the zero in the bending angle anomaly.

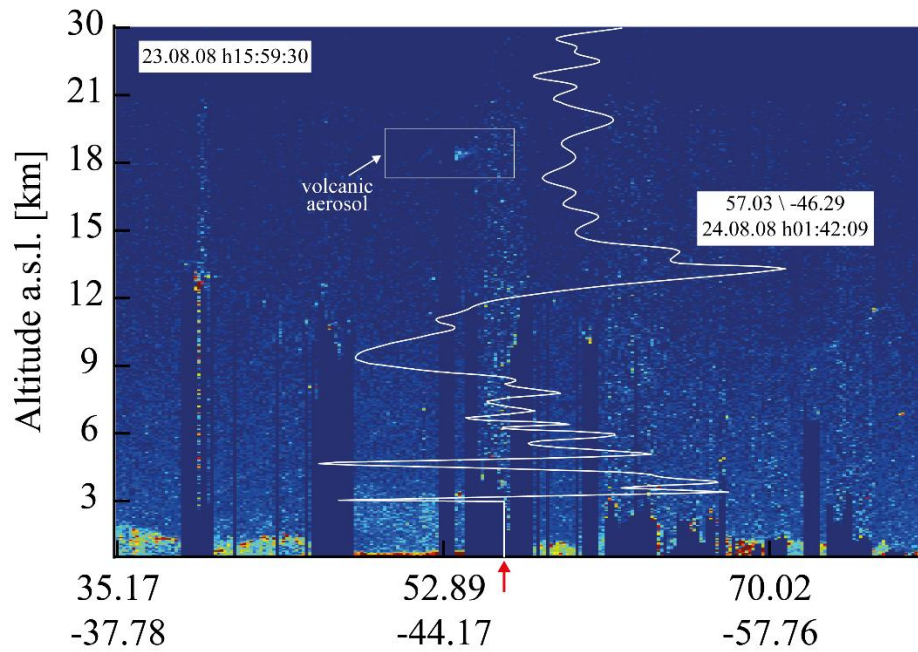

**Figure S4.** CALIOP backscatter image (product of level 1.5) acquired on 23.08.08 with superimposed the collocated bending angle anomaly representing collocation number 23. The RO profile is spatially well collocated with the volcanic cloud, which is not largely extended, and in the 12 hours range. The automated peak detection detects a peak at about 12 km, while the volcanic cloud is at about 18 km. The product of level 1.5 is a new type of product available from NASA. It is in the 532 nm wavelength, as the product of level 1, however, in this case, meteorological clouds are cleared out and only the aerosol is left. The pixel resolution is also coarser than in level 1. The red arrow represents the zero in the bending angle anomaly.

**Table S1** Altitude estimations table. The table summarizes the collocations altitudes estimated from the Global Navigation Satellite System (GNSS) RO bending angle (BA) anomaly and CALIOP backscatter. This data has been used to create Figure 2. Furthermore, the latitude (Lat) and longitude (Lon) of the collocated RO profiles are reported.

|    | <i>RO cloud<br/>altitude [km]</i> | <i>Lat RO</i> | <i>Lon RO</i> | <i>CALIOP cloud<br/>top [km]</i> | <i>CALIOP cloud<br/>average [km]</i> | <i>CALIOP cloud<br/>bottom [km]</i> |
|----|-----------------------------------|---------------|---------------|----------------------------------|--------------------------------------|-------------------------------------|
| 1  | 10.9                              | 53.678        | -168.259      | 12.07                            | 10.13                                | 8.19                                |
| 2  | 12.2                              | 50.231        | -163.291      | 13.09                            | 12.43                                | 11.77                               |
| 3  | 12                                | 47.431        | -134.352      | 13.68                            | 12.725                               | 11.77                               |
| 4  | 10.4                              | 68.851        | -62.485       | 12.61                            | 12.28                                | 11.95                               |
| 5  | 16.6                              | 40.657        | -103.740      | 12.55                            | 12.31                                | 12.07                               |
| 6  | 10                                | 59.239        | -18.441       | 12.01                            | 10.19                                | 8.36                                |
| 7  | 10.2                              | 68.069        | -35.778       | 12.25                            | 10.96                                | 9.67                                |
| 8  | 12.8                              | 49.909        | -97.222       | 13.09                            | 12.16                                | 11.23                               |
| 9  | 18.1                              | 46.500        | -123.347      | 17.76                            | 17.31                                | 16.86                               |
| 10 | 11.7                              | 67.534        | 153.773       | 12.07                            | 11.50                                | 10.94                               |
| 11 | 18                                | 39.265        | -97.679       | 18.54                            | 17.88                                | 17.22                               |
| 12 | 11.2                              | 59.653        | -25.923       | 12.55                            | 12.01                                | 11.47                               |
| 13 | 11                                | 72.446        | -23.219       | 12.43                            | 11.11                                | 9.79                                |
| 14 | 15.5                              | 56.899        | -87.943       | 18.12                            | 17.88                                | 17.64                               |
| 15 | 10.6                              | 64.834        | 19.158        | 13.51                            | 12.07                                | 10.64                               |
| 16 | 10                                | 76.959        | -27.592       | 11.24                            | 10.94                                | 10.64                               |
| 17 | 12.3                              | 70.498        | 139.208       | 12.37                            | 10.58                                | 8.78                                |
| 18 | 12.6                              | 46.127        | 97.335        | 12.25                            | 10.58                                | 8.90                                |
| 19 | 11.9                              | 72.890        | 146.049       | 12.07                            | 10.79                                | 9.50                                |
| 20 | 11.5                              | 72.770        | 71.836        | 12.37                            | 11.24                                | 10.10                               |
| 21 | 11.3                              | 64.633        | -164.266      | 11.59                            | 10.28                                | 8.96                                |
| 22 | 12.1                              | 49.699        | -81.321       | 19.14                            | 18.27                                | 17.40                               |
| 23 | 12.8                              | 57.032        | -46.285       | 18.12                            | 17.76                                | 17.40                               |
| 24 | 13.4                              | 62.385        | 151.075       | 12.97                            | 12.07                                | 11.17                               |
| 25 | 12.6                              | 61.624        | 165.281       | 13.09                            | 11.21                                | 9.32                                |
| 26 | 10.1                              | 75.323        | 124.855       | 11.65                            | 10.37                                | 9.08                                |
| 27 | 11.7                              | 79.640        | -29.009       | 12.85                            | 11.29                                | 9.74                                |
| 28 | 11.2                              | 71.802        | -131.622      | 12.85                            | 11.29                                | 9.74                                |

**Table S2.** Table summarizing the date and time of each collocation for the RO profiles, CALIOP, atmospheric infrared sounder (AIRS), infrared atmospheric sounding interferometer (IASI), and Global Ozone Monitoring Experiment-2 (GOME-2). In a few cases, the same RO profile is collocated with two satellite sensors between AIRS, IASI, and GOME-2 at a different time thus giving additional confidence that the volcanic cloud (VC) was present at the time of the RO profile acquisition. Time is in UTC.

|    | <i>Date RO</i>             | <i>Date CALIOP</i>         | <i>Date AIRS</i>           | <i>Date IASI</i>           | <i>Date GOME</i>           |
|----|----------------------------|----------------------------|----------------------------|----------------------------|----------------------------|
| 1  | 8 August 2008<br>03:56:53  | 8 August 2008<br>13:43:30  | 8 August 2008<br>13:42:00  |                            |                            |
| 2  | 9 August 2008<br>21:09:31  | 9 August 2008<br>23:59:30  | 9 August 2008<br>12:48:00  |                            |                            |
| 3  | 12 August 2008<br>00:24:00 | 11 August 2008<br>22:07:30 | 11 August 2008<br>22:06:00 | 11 August 2008<br>18:42:16 |                            |
| 4  | 13 August 2008<br>17:15:58 | 13 August 2008<br>07:22:10 | 13 August 2008<br>07:18:00 | 13 August 2008<br>14:31:19 |                            |
| 5  | 13 August 2008<br>01:29:57 | 13 August 2008<br>09:09:00 | 13 August 2008<br>09:06:00 |                            | 12 August 2008<br>16:41:49 |
| 6  | 14 August 2008<br>16:37:45 | 15 August 2008<br>03:54:50 | 14 August 2008<br>12:48:00 | 14 August 2008<br>12:30:51 |                            |
| 7  | 15 August 2008<br>10:33:27 | 15 August 2008<br>05:31:10 | 15 August 2008<br>05:30:00 |                            |                            |
| 8  | 14 August 2008<br>22:27:25 | 15 August 2008<br>08:54:10 | 15 August 2008<br>08:48:00 | 15 August 2008<br>03:24:14 |                            |
| 9  | 15 August 2008<br>12:37:43 | 15 August 2008<br>10:34:00 | 15 August 2008<br>21:36:00 | 15 August 2008<br>05:04:45 |                            |
| 10 | 17 August 2008<br>09:09:24 | 17 August 2008<br>16:51:10 |                            | 17 August 2008<br>01:17:32 |                            |
| 11 | 18 August 2008<br>03:19:32 | 17 August 2008<br>19:49:20 |                            | 17 August 2008<br>16:38:20 |                            |
| 12 | 17 August 2008<br>16:38:26 | 18 August 2008<br>04:25:40 | 17 August 2008<br>13:18:00 |                            |                            |
| 13 | 18 August 2008<br>17:39:33 | 19 August 2008<br>05:05:10 | 18 August 2008<br>05:54:00 |                            |                            |
| 14 | 20 August 2008<br>14:28:57 | 20 August 2008<br>18:46:20 | 20 August 2008<br>18:42:00 |                            |                            |
| 15 | 21 August 2008<br>22:21:36 | 21 August 2008<br>11:17:30 |                            | 21 August 2008<br>18:17:06 |                            |
| 16 | 21 August 2008<br>01:35:36 | 21 August 2008<br>13:00:10 |                            | 20 August 2008<br>18:42:59 |                            |
| 17 | 22 August 2008<br>00:51:43 | 21 August 2008<br>18:04:30 |                            |                            | 22 August 2008<br>00:21:27 |
| 18 | 21 August 2008<br>19:29:51 | 21 August 2008<br>19:50:20 |                            | 22 August 2008<br>03:02:30 |                            |
| 19 | 22 August 2008<br>04:54:05 | 22 August 2008<br>02:09:50 |                            | 22 August 2008<br>01:13:09 |                            |
| 20 | 22 August 2008<br>02:57:40 | 22 August 2008<br>07:06:30 |                            |                            | 22 August 2008<br>05:24:45 |



|    |                            |                            |                            |                            |
|----|----------------------------|----------------------------|----------------------------|----------------------------|
| 21 | 22 August 2008<br>04:41:36 | 22 August 2008<br>13:52:50 | 21 August 2008<br>20:11:51 |                            |
| 22 | 22 August 2008<br>07:02:30 | 22 August 2008<br>18:32:00 | 22 August 2008<br>02:38:38 |                            |
| 23 | 24 August 2008<br>01:42:09 | 23 August 2008<br>15:59:30 |                            | 23 August 2008<br>13:55:24 |
| 24 | 24 August 2008<br>23:57:44 | 25 August 2008<br>02:37:40 |                            | 25 August 2008<br>00:23:25 |
| 25 | 25 August 2008<br>18:35:00 | 26 August 2008<br>01:41:50 |                            | 26 August 2008<br>00:22:53 |
| 26 | 28 August 2008<br>03:38:17 | 28 August 2008<br>03:12:30 | 28 August 2008<br>02:29:32 |                            |
| 27 | 29 August 2008<br>00:13:24 | 29 August 2008<br>12:11:50 |                            | 28 August 2008<br>17:09:42 |
| 28 | 29 August 2008<br>08:43:45 | 29 August 2008<br>12:18:00 |                            | 28 August 2008<br>22:43:57 |

**Table S3.** Error estimation table. The table summarizes the correlation coefficient ( $R^2$ ), the root-mean-square error (rmse) and standard deviation (std) of the estimation between the RO BA anomaly profiles and the CALIOP backscatter images.

|                                             | <i>Correlation<br/>coefficient (<math>R^2</math>)</i> | <i>Root mean square error<br/>(rmse)<br/>[km]</i> | <i>Standard deviation (std)<br/>[km]</i> |
|---------------------------------------------|-------------------------------------------------------|---------------------------------------------------|------------------------------------------|
| <i>RO – CALIOP top</i>                      | 0.65                                                  | 2.25                                              | 1.62                                     |
| <i>RO – CALIOP average</i>                  | 0.67                                                  | 1.98                                              | 1.51                                     |
| <i>RO – CALIOP bottom</i>                   | 0.67                                                  | 2.36                                              | 1.42                                     |
| <i>RO – CALIOP top w/o outliers</i>         | 0.90                                                  | 1.38                                              | 0.81                                     |
| <i>RO – CALIOP average w/o<br/>outliers</i> | 0.88                                                  | 1.08                                              | 0.66                                     |
| <i>RO – CALIOP bottom w/o<br/>outliers</i>  | 0.83                                                  | 1.86                                              | 1.04                                     |
| <i>RO – CALIOP top 4h range</i>             | 0.93                                                  | 1.07                                              | 0.65                                     |
| <i>RO – CALIOP average 4h range</i>         | 0.92                                                  | 1.02                                              | 0.65                                     |
| <i>RO – CALIOP bottom 4h range</i>          | 0.90                                                  | 1.92                                              | 1.15                                     |
